# Supplementary material for: A training strategy for hybrid models to break the curse of dimensionality
Source: PubMed Central journal article supplement (PMC9477345; doi:10.1371/journal.pone.0274569), 2022-09-15
Supplement: pone.0274569.s001.pdf [file pone.0274569.s001.pdf]

## S1 Appendix. Schematic representation of the tree structures

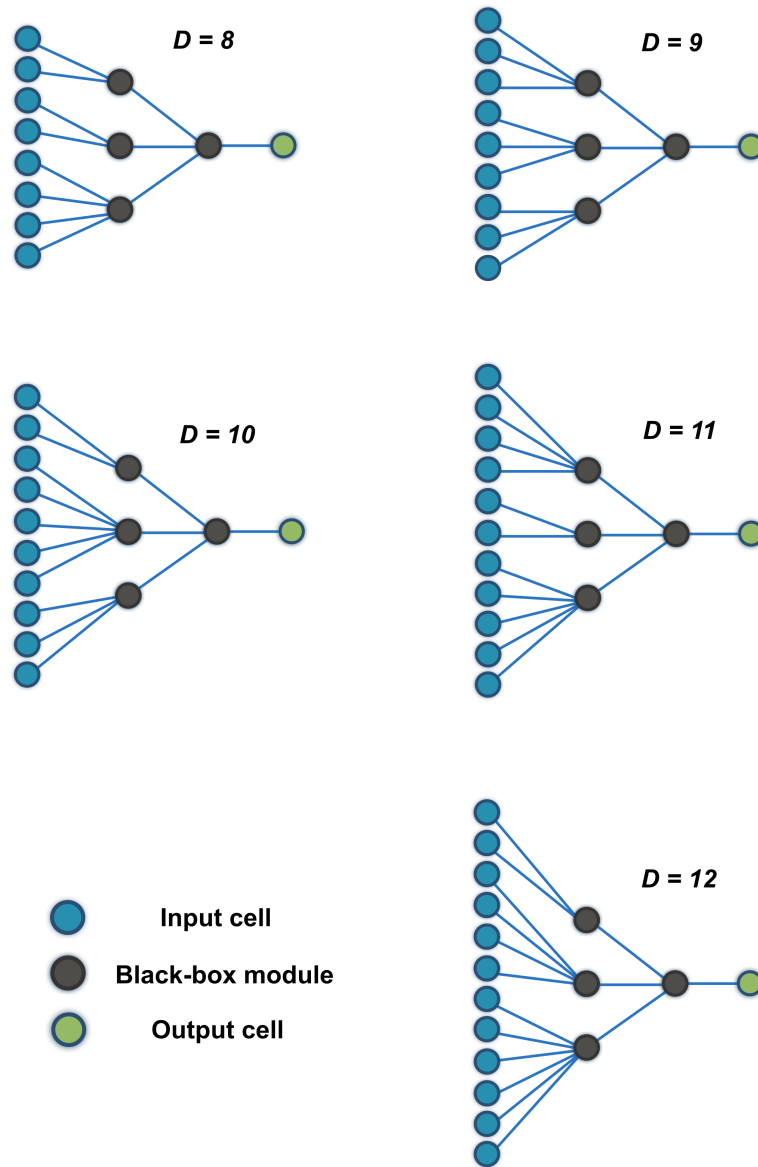

Figure 1: Tree structured networks mapping  $x \in \{0, 1\}^d$ , where  $d \in \{8, 9, 10, 11, 12\}$ , to binary output labels  $y \in \{0, 1\}$

In the above figure, some examples of the tree structure networks used for generating synthetic data are presented. All tree structures have 2 layers of black-box modules with binary inputs  $x \in \{0, 1\}^d$ ,  $d \in \{8, 9, 10, 11, 12\}$ , three black-box modules in the first layer, an output black-box modules in the second layer, and binary output labels  $y \in \{0, 1\}$ . Each structure was randomly constructed in a way that each first-layer black-box module operates on 2–6 separate input entries and forwards the partial results to the

black-box output module. For each input dimension, 6 different network structures had been created resulting in 30 tree structures in total. The table below shows the details of the connections of all the tree generated tree structures.

Table 1: **The connections between the input layer and the 3 black-box modules in the first layer of the structured hybrid models, named as  $n_1$ ,  $n_2$ , and  $n_3$ .**

| Input Data Dimension | $n_1$ | $n_2$ | $n_3$ |
|----------------------|-------|-------|-------|
| 8                    | 2     | 2     | 4     |
|                      | 2     | 3     | 3     |
|                      | 2     | 4     | 2     |
|                      | 3     | 2     | 3     |
|                      | 3     | 3     | 2     |
|                      | 4     | 2     | 2     |
| 9                    | 2     | 2     | 5     |
|                      | 2     | 3     | 4     |
|                      | 2     | 4     | 3     |
|                      | 2     | 5     | 2     |
|                      | 3     | 2     | 4     |
|                      | 3     | 3     | 3     |
| 10                   | 2     | 2     | 6     |
|                      | 2     | 3     | 5     |
|                      | 2     | 4     | 4     |
|                      | 2     | 5     | 3     |
|                      | 3     | 3     | 4     |
|                      | 3     | 4     | 3     |
| 11                   | 2     | 3     | 6     |
|                      | 4     | 3     | 4     |
|                      | 2     | 4     | 5     |
|                      | 3     | 3     | 5     |
|                      | 3     | 4     | 4     |
|                      | 4     | 4     | 3     |
| 12                   | 2     | 4     | 6     |
|                      | 5     | 3     | 4     |
|                      | 2     | 5     | 5     |
|                      | 3     | 3     | 6     |
|                      | 4     | 4     | 4     |
|                      | 3     | 5     | 4     |
