# Supplementary material for: A training strategy for hybrid models to break the curse of dimensionality
Source: PubMed Central journal article supplement (PMC9477345; doi:10.1371/journal.pone.0274569), 2022-09-15
Supplement: pone.0274569.s002.pdf [file pone.0274569.s002.pdf]

## S2 Appendix. COVID-19 data binarization

Converting the clinical and physiological COVID-19 patient features to binary variables.

### Step-1: Decision tree classifier

We studied biometric information and physiological parameters of the COVID-19 patients for the first 7-days of ICU stay. Figure 1 illustrates the results of a decision tree classifier for classifying patients according to their vital status. The decision tree classifier was implemented in Python using the open-source library Scikit-learn [1], and it was set to minimum-samples-split of 6 and minimum-impurity-decrease of 0.03 to avoid overfitting.

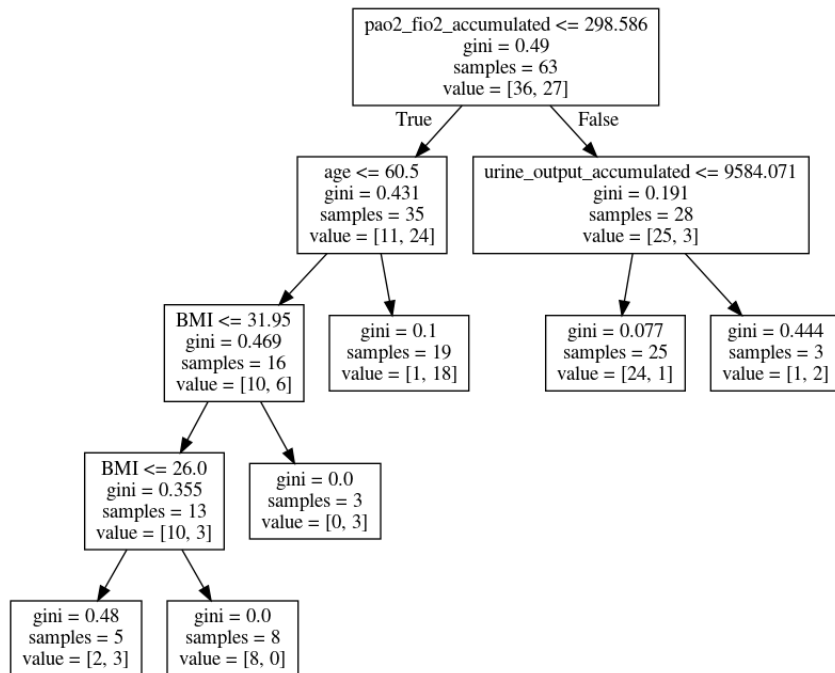

Figure 1: **Decision tree classification on the vital status of the COVID-19 patients.** 63 critically ill COVID-19 patients in which 27 were labeled as non-survivals were classified by a decision tree classifier using gini impurity criterion. The value quantities in the above figure represent [# survivals, # non-survivals] within the related sample size.

### Step-2: Binarization

First, we binarized the five most important COVID-19 patient features using the critical values in the decision tree classifier. Then, a hybrid network with two different modules acting separately on the biometric information (Age, BMI) and the physiological parameters ( $PaO_2/FiO_2$ , Urine-output) was reconstructed, which maps 5-d binary input information to binary mortality status. Next, we labeled 5-d binarized COVID-19 patient clinical information based on a 75% cutoff on the mortality rates for the associated decimal repre-

sentation. As shown in Table 1, the information of 63 patients was embedded into 20 decimal configurations out of the possible 32.

Table 1: **Binary representation of COVID-19 patients features.**

| Age | BMI-1 | BMI-2 | Acc.( $PaO_2/FiO_2$ ) | Acc.(Urine-output) | Decimal | Vital Status* |
|-----|-------|-------|-----------------------|--------------------|---------|---------------|
| 0   | 0     | 0     | 0                     | 0                  | 0       | 0             |
| 0   | 0     | 0     | 1                     | 1                  | 3       | 0             |
| 0   | 0     | 1     | 0                     | 0                  | 4       | 0             |
| 0   | 0     | 1     | 1                     | 0                  | 6       | 1             |
| 0   | 1     | 0     | 0                     | 0                  | 8       | 0             |
| 0   | 1     | 0     | 0                     | 1                  | 9       | 0             |
| 0   | 1     | 0     | 1                     | 0                  | 10      | 0             |
| 0   | 1     | 0     | 1                     | 1                  | 11      | 0             |
| 0   | 1     | 1     | 0                     | 0                  | 12      | 0             |
| 0   | 1     | 1     | 1                     | 0                  | 14      | 1             |
| 0   | 1     | 1     | 1                     | 1                  | 15      | 1             |
| 1   | 0     | 0     | 1                     | 0                  | 18      | 1             |
| 1   | 0     | 1     | 0                     | 0                  | 20      | 0             |
| 1   | 0     | 1     | 1                     | 0                  | 22      | 1             |
| 1   | 1     | 0     | 0                     | 0                  | 24      | 0             |
| 1   | 1     | 0     | 1                     | 0                  | 26      | 1             |
| 1   | 1     | 0     | 1                     | 1                  | 27      | 1             |
| 1   | 1     | 1     | 0                     | 0                  | 28      | 0             |
| 1   | 1     | 1     | 0                     | 1                  | 29      | 1             |
| 1   | 1     | 1     | 1                     | 0                  | 30      | 1             |

\* Vital Status of "0" and "1" states survivals and non-survivals, respectively.

## References

- [1] Scikit-learn: Machine Learning in Python, Pedregosa et al., JMLR 12, pp. 2825-2830, 2011.
