# Supplementary material for: A training strategy for hybrid models to break the curse of dimensionality
Source: PubMed Central journal article supplement (PMC9477345; doi:10.1371/journal.pone.0274569), 2022-09-15
Supplement: pone.0274569.s003.pdf [file pone.0274569.s003.pdf]

## S3 Appendix. Hyperparameter optimization results

Here we show the optimized hyperparameters of the examined supervised learning ML classifiers, namely Deep Neural Network (DNN), Support vector Machine (SVM), Random Forest (RF), and Logistic Regression (LR), which is done by a grid search cross-validation object [1]. We employed 5-fold Stratified cross-validation on shuffled training data. The performances of the selected hyperparameters and trained model were then measured on a dedicated evaluation set that was not used during the model selection step.

### 1 Support Vector Machine

Table 1: The optimized hyperparameter of SVM for each input dimension of the synthetic data.

| Input Data Dimension | C*   | Kernel           | Gamma** |
|----------------------|------|------------------|---------|
| 8                    | 10   | rbf <sup>†</sup> | 0.5     |
| 9                    | 10   | rbf              | 0.1     |
| 10                   | 100  | rbf              | 0.1     |
| 11                   | 100  | rbf              | 0.1     |
| 12                   | 1000 | rbf              | 0.1     |

\* Regularization parameter

\*\* Kernel coefficient

<sup>†</sup> Radial basis function Radial basis function

### 2 Random Forests

Table 2: The optimized hyperparameter of RF for each input dimension of the synthetic data.

| Input Data Dimension | Bootstrap | Max. depth | Max. features | Min. samples leaf/split | # estimators |
|----------------------|-----------|------------|---------------|-------------------------|--------------|
| 8                    | True      | 10         | Auto          | 1/2                     | 200          |
| 9                    | False     | 10         | Auto          | 1/2                     | 300          |
| 10                   | True      | 10         | Auto          | 2/2                     | 300          |
| 11                   | True      | 50         | Auto          | 1/2                     | 200          |
| 12                   | False     | 20         | sqrt*         | 1/5                     | 200          |

\* Square-root of the number of features (here input data dimension)

### 3 Logistic Regression

Table 3: The optimized hyperparameter of LR for each input dimension of the synthetic data.

| Input Data Dimension | C*    | Penalty | Solver    |
|----------------------|-------|---------|-----------|
| 8                    | 0.001 | none    | Newton-cg |
| 9                    | 1     | L1      | liblinear |
| 10                   | 1     | L2      | Newton-cg |
| 11                   | 0.001 | none    | Newton-cg |
| 12                   | 0.1   | L1      | liblinear |

\* Inverse of regularization strength

### 4 Deep Neural Networks

For DNNs, we used Keras Tuner [2] hyperparameter optimization framework to optimize the hyperparameters of DNNs for each data dimensions. Here, we present the network summary of the networks related to each synthetic data input dimension.

For all different synthetic data input dimensions, we employed DNN classifiers with fully connected hidden layers. To compute the binary output of the network, we used a Softmax activation function. For training the DNN, we minimized the sparse categorical cross-entropy loss function of the predictions by the Adam’s adaptive learning-rate optimization algorithm using the TensorFlow library [3].

Table 4: The network summary of the DNN employed for 8-dimensional synthetic data.

| Layer type | Output shape | Activation function | # parameters |
|------------|--------------|---------------------|--------------|
| Dense      | (None,48)    | ReLU                | 432          |
| Dense      | (None,64)    | Sigmoid             | 3136         |
| Dense      | (None,2)     | Softmax             | 130          |

# hidden layers = 1

Learning rate = 0.01

Total # trainable parameters = 3698

Table 5: The network summary of the DNN employed for 9-dimensional synthetic data.

| Layer type | Output shape | Activation function | # parameters |
|------------|--------------|---------------------|--------------|
| Dense      | (None,32)    | ReLU                | 320          |
| Dense      | (None,48)    | ReLU                | 1584         |
| Dense      | (None,2)     | Softmax             | 98           |

# hidden layers = 1

Learning rate = 0.001

Total # trainable parameters = 2002

Table 6: The network summary of the DNN employed for 10-dimensional synthetic data.

| Layer type | Output shape | Activation function | # parameters |
|------------|--------------|---------------------|--------------|
| Dense      | (None,48)    | Tanh                | 528          |
| Dense      | (None,48)    | Sigmoid             | 2352         |
| Dense      | (None,64)    | Sigmoid             | 3136         |
| Dense      | (None,16)    | Sigmoid             | 1040         |
| Dense      | (None,2)     | Softmax             | 34           |

# hidden layers = 3  
Learning rate = 0.001  
Total # trainable parameters = 7090

Table 7: The network summary of the DNN employed for 11-dimensional synthetic data.

| Layer type | Output shape | Activation function | # parameters |
|------------|--------------|---------------------|--------------|
| Dense      | (None,32)    | Tanh                | 384          |
| Dense      | (None,48)    | Tanh                | 1584         |
| Dense      | (None,48)    | Tanh                | 2352         |
| Dense      | (None,32)    | Tanh                | 1568         |
| Dense      | (None,2)     | Softmax             | 66           |

# hidden layers = 3  
Learning rate = 0.01  
Total # trainable parameters = 5954

Table 8: The network summary of the DNN employed for 12-dimensional synthetic data.

| Layer type | Output shape | Activation function | # parameters |
|------------|--------------|---------------------|--------------|
| Dense      | (None,48)    | Tanh                | 624          |
| Dense      | (None,32)    | Tanh                | 1568         |
| Dense      | (None,16)    | Tanh                | 528          |
| Dense      | (None,2)     | Softmax             | 34           |

# hidden layers = 2  
Learning rate = 0.01  
Total # trainable parameters = 2754

## References

- [1] Scikit-learn: Machine Learning in Python, Pedregosa et al., JMLR 12, pp. 2825-2830, 2011.
- [2] O'Malley T, Bursztein E, Long J, Chollet, F, Jin, H, Invernizzi, L. others: Keras Tuner. 2019, [github.com/keras-team/keras-tuner](https://github.com/keras-team/keras-tuner).
- [3] Abadi M, Agarwal A, Barham P, Brevdo E, Chen Z, et al. . Tensorflow: large-scale machine learning on heterogeneous distributed systems (2016). arXiv preprint arXiv:1603.04467. 2015;52.
