# Supplementary material for: A training strategy for hybrid models to break the curse of dimensionality
Source: PubMed Central journal article supplement (PMC9477345; doi:10.1371/journal.pone.0274569), 2022-09-15
Supplement: pone.0274569.s006.pdf [file pone.0274569.s006.pdf]

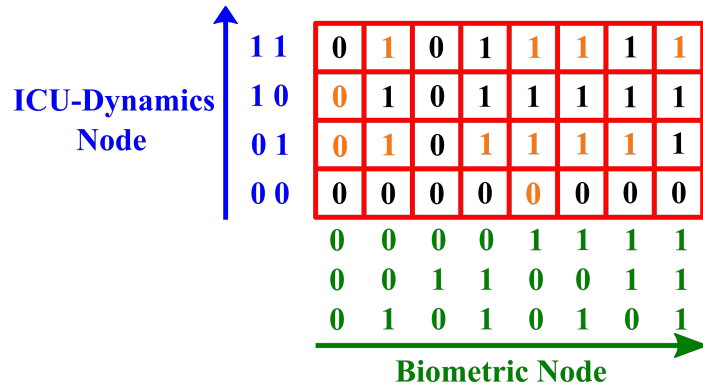

**S2 Fig. Filled orthotope of the COVID-19 hybrid network.** The filled orthotope of the COVID-19 network after performing the learning strategy. The black binary numbers represent mortality status of the original data, and the orange binary numbers demonstrate the extrapolated mortality status.
