# Supplementary material for: A training strategy for hybrid models to break the curse of dimensionality
Source: PubMed Central journal article supplement (PMC9477345; doi:10.1371/journal.pone.0274569), 2022-09-15
Supplement: pone.0274569.s007.pdf [file pone.0274569.s007.pdf]

**S1 Table. Physiological parameters used by the decision tree classifier of the COVID-19 patients' mortality status.** The physiological parameters required for the SOFA score assessment. The parameters were evaluated for the first 7-days of ICU stay.

|                                               | <b>Total</b>    | <b>Survival</b> | <b>Non-survival</b> |
|-----------------------------------------------|-----------------|-----------------|---------------------|
| <i>PaO<sub>2</sub>/FiO<sub>2</sub> (mmHg)</i> | 109.92 (38.94)  | 124 (45.58)     | 96.01 (24.68)       |
| Arterial pressure ( <i>mmHg</i> )             | 54.5 (9.08)     | 55.21 (8.48)    | 52.85 (10.32)       |
| Bilirubin ( <i>mg/dL</i> )                    | 0.66 (0.73)     | 0.55 (0.52)     | 1.02 (1.11)         |
| Platelets ( $\times 10^3/\mu l$ )             | 255.57 (168.81) | 259.14 (173.64) | 241.42 (175.45)     |
| Creatinine ( <i>mg/dL</i> )                   | 1.12 (1.28)     | 1 (0.72)        | 1.85 (1.54)         |
| Urine output ( <i>ml/d</i> )                  | 2344 (2464)     | 2462 (1110)     | 1600 (2723)         |

Values are represented as median (IQR).
